# Supplementary material for: Associations of Filaggrin Gene Loss-of-Function Variants with Urinary Phthalate Metabolites and Testicular Function in Young Danish Men
Source: PubMed Central journal article supplement (PMC3984221; doi:10.1289/ehp.1306720), 2014-01-03
Supplement: ehp.1306720.s001.pdf [file ehp.1306720.s001.pdf]

**Supplemental Material**  
**Associations of Filaggrin Gene Loss-of-Function Variants  
with Urinary Phthalate Metabolites and Testicular  
Function in Young Danish Men**

Ulla Nordström Joensen, Niels Jørgensen, Michael Meldgaard, Hanne Frederiksen, Anna-Maria Andersson, Torkil Menné, Jeanne Duus Johansen, Berit Christina Carlsen, Steen Stender, Pal Bela Szecsi, Niels Erik Skakkebæk, Ewa Rajpert-De Meyts, and Jacob P. Thyssen

**Table of Contents**

|                                  |        |
|----------------------------------|--------|
| Supplemental Material, Table S1  | page 2 |
| Supplemental Material, Figure S1 | page 3 |

**Supplemental Material, Table S1.** Genotype distribution by participation year, N (%), show that a higher frequency of *FLG* null carriers was observed in 2007 than in 2008 and 2009 (difference in frequency distribution between year is not statistically significant).

|                          | <b>Participation<br/>year</b> | <b>Homozygous</b> | <b>Heterozygous</b> | <b>Wild-type</b> |
|--------------------------|-------------------------------|-------------------|---------------------|------------------|
| R501X                    | 2007                          | 0                 | 10 (4)              | 265 (96)         |
|                          | 2008                          | 1 (0.3)           | 5 (2)               | 284 (98)         |
|                          | 2009                          | 0                 | 6 (2)               | 289 (98)         |
| 2282del4                 | 2007                          | 0                 | 14 (5)              | 261 (95)         |
|                          | 2008                          | 0                 | 11 (4)              | 279 (96)         |
|                          | 2009                          | 0                 | 9 (3)               | 286 (97)         |
| R2447X                   | 2007                          | 0                 | 5 (2)               | 270 (98)         |
|                          | 2008                          | 0                 | 1 (0.3)             | 289 (100)        |
|                          | 2009                          | 0                 | 4 (1)               | 291 (99)         |
| <i>FLG</i> null carriers | 2007                          | 0                 | 29 (11)             | 246 (89)         |
|                          | 2008                          | 1 (0.3)           | 17 (6)              | 272 (94)         |
|                          | 2009                          | 1 (0.3)           | 17 (6)              | 277 (94)         |

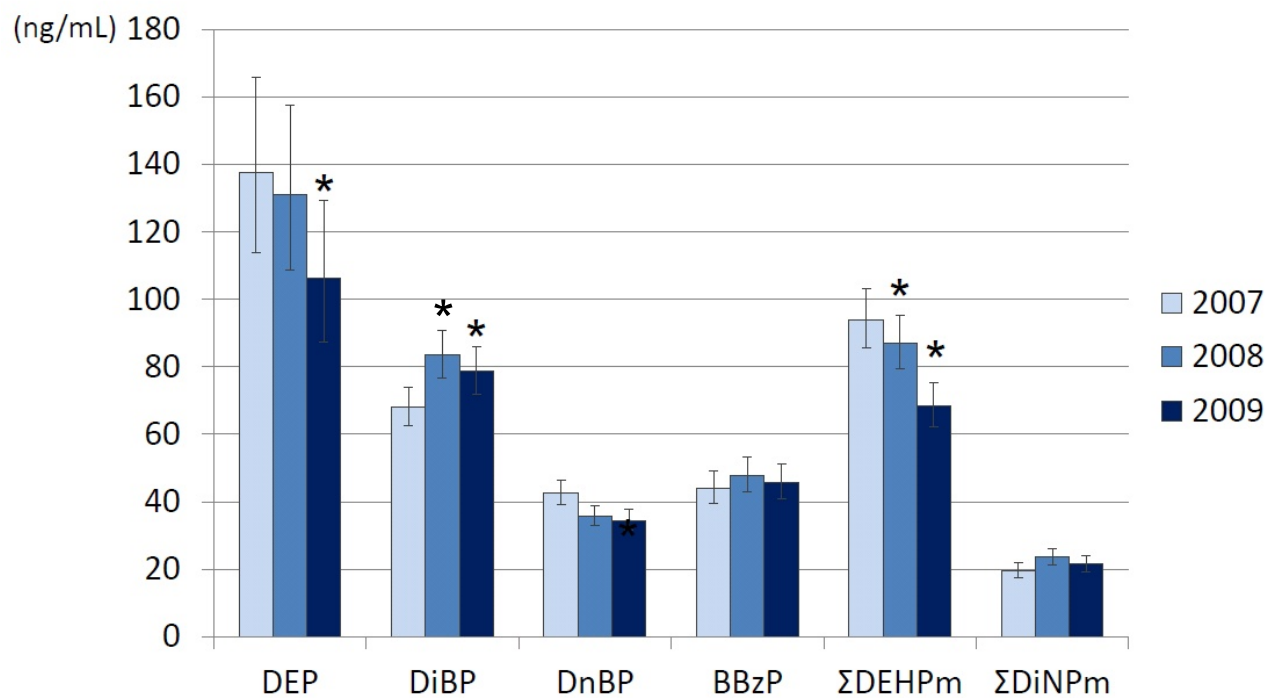

**Supplemental Material, Figure S1.** Phthalate excretion by year of examination in young Danish men (N = 861). Phthalate diesters (ng/mL) are calculated from urinary concentrations of their respective metabolites. Bars are geometric means (predicted values for a 19 year-old non-smoker). Whiskers are 95% CI for the geometric mean. \*p < 0.05 for difference from 2007 levels.
